# Supplementary material for: First Report of Domoic Acid Production from Pseudo-nitzschia multistriata in Paracas Bay (Peru)
Source: MDPI journal article supplement (doi:10.3390/toxins13060408), 2021-06-09
Supplement: s1 [file s1]

## Supplementary Materials: First Report of Domoic Acid Production from *Pseudo-nitzschia multistriata* in Paracas Bay (Peru)

Cecil Tenorio, Gonzalo Álvarez, Sonia Quijano-Scheggia, Melissa Perez-Alania, Natalia Arakaki, Michael Araya, Francisco Álvarez, Juan Blanco and Eduardo Uribe

**Table S1.** Accurate mass and mass deviation (ppm) of domoic acid and its main fragments.

| Ion                                                              | Theoretical Mass | Experimental Mass | Delta (ppm) |
|------------------------------------------------------------------|------------------|-------------------|-------------|
| [M+H] <sup>+</sup>                                               | 312.1447         | 312.1449          | 0.64        |
| [M+H-H <sub>2</sub> O] <sup>+</sup>                              | 294.1342         | 294.1332          | −3.39       |
| [M+H-CH <sub>2</sub> O <sub>2</sub> ] <sup>+</sup>               | 266.1392         | 266.1384          | −3.00       |
| [M+H-CH <sub>4</sub> O <sub>3</sub> ] <sup>+</sup>               | 248.1287         | 248.1277          | −4.03       |
| [M+H-C <sub>2</sub> H <sub>4</sub> O <sub>4</sub> ] <sup>+</sup> | 220.1338         | 220.1329          | −4.09       |

**Table S2.** Comparison of morphometric data between Peruvian strain of *Pseudo-nitzschia multistriata* with strains obtained from different locations around the world.

| Apical Axis<br>( $\mu\text{m}$ ) Length | Transapical<br>Axis ( $\mu\text{m}$ )<br>Width | Fibulae<br>/10 $\mu\text{m}$ | Stria<br>/10 $\mu\text{m}$ | Rows of<br>Poroids   | Poroids<br>/1 $\mu\text{m}$ | Band<br>Striae<br>/10 $\mu\text{m}$ | VC/<br>Stria<br>/10 $\mu\text{m}$ | References                                                                                                                     |
|-----------------------------------------|------------------------------------------------|------------------------------|----------------------------|----------------------|-----------------------------|-------------------------------------|-----------------------------------|--------------------------------------------------------------------------------------------------------------------------------|
| 40–48                                   | 2.3–3.23                                       | 24–28                        | 40–42                      | 2–3                  | 8–13                        |                                     |                                   | Paracas Bay, Peru                                                                                                              |
| 55–65                                   | 3.1–3.6                                        | 23–26                        | 37–42                      | 2 (rarely<br>1 or 3) | 5–6                         |                                     |                                   | Fukukoka Bay, Japan [1]                                                                                                        |
| 44–78                                   | 2.8–4                                          | 22–29                        | 34–42                      | 2–3                  | 9–13                        |                                     | 45–50                             | Western North Pacific, Peter<br>the Great Bay, Sea of Japan in<br>the coastal waters of Sakhalin<br>Island, Sea of Okhotsk [2] |
|                                         | 2.5–3.8                                        | 22–27                        | 37–44                      |                      | 10–12                       |                                     |                                   | Sea of Japan [3]                                                                                                               |
| 47–53                                   | 2.3–3.2                                        | 24–29                        |                            | 2                    | 9–12                        |                                     |                                   | Tokyo bay [4]                                                                                                                  |
| 45–78                                   | 2.3–4                                          | 25–29                        | 32–40                      | 2                    | 9–12                        |                                     | 45–46                             | Amursky Bay, Sea of Japan<br>[5]                                                                                               |
| 37–53                                   | 3.4–3.8                                        | 25–29                        |                            | 2                    | 10–12                       |                                     |                                   | Guangdong coastal waters,<br>South China Sea [6]                                                                               |
| 58–60                                   | 2.5                                            | 22–23                        |                            | 2–3                  | 11                          |                                     |                                   | Vietnam [7]                                                                                                                    |
| 43–91                                   | 1.4–2.5                                        | 23–25                        | 38–40                      | 2–3                  | 11–12                       |                                     |                                   | Coasts of Malaysia [8]                                                                                                         |
|                                         | 3.3–3.8                                        | 26–30                        | 38–40                      | 2 (3)                | 12                          |                                     |                                   | Singapore [9]                                                                                                                  |
| 38–50                                   | 2.5–4                                          | 23–32                        | 37–44                      | 2 (rarely<br>1 or 3) | 11–13                       |                                     |                                   | Tunisia [10,11]                                                                                                                |
| 36–50                                   | 2.7–4.1                                        | 22–26                        | 36–42                      | 2                    | 9–10                        |                                     |                                   | Catalan coast (NW Mediterra-<br>nean) [12,13]                                                                                  |
| 51–70                                   | 2.7–3                                          | 24–26                        | 36–39                      | 2–3                  | 10–11                       |                                     |                                   | Channels of Ria de Aveiro,<br>Portugal[14]                                                                                     |
| –                                       | 2.8–3.6                                        | 24–28                        | 38–45                      | 2 (rarely<br>3)      | 10–15                       | 48–51                               |                                   | Greek coastal waters [15]                                                                                                      |
| 60.2–70.3                               | 3.3–3.8                                        | 26–30                        | 38–40                      | 2(3)                 | 12                          |                                     |                                   | M'diq Bay, Morocco, Mediter-<br>ranean Sea [16]                                                                                |
| 38–50                                   | 2.5–4                                          | 23–32                        | 37–44                      | 2 (rarely<br>1 or 3) | 11–13                       |                                     |                                   | Gulf of Naples (Italy, Medi-<br>terranean Sea) [17].                                                                           |
| 38–50                                   | 2.8–3.8                                        | 23–28                        | 37–46                      | 2                    | 11–12                       |                                     |                                   | Gulf of Naples (Mediterra-<br>nean sea) [18]                                                                                   |
| 35–75                                   | 3–3.5                                          | 24–26                        | 38–43                      |                      |                             |                                     |                                   | Gulf Naples [19]                                                                                                               |
| 30–60                                   | 2.2–4.6                                        | 24–28                        | 34–45                      | 2                    | 7–13                        |                                     |                                   | Gulf of Trieste, Northern<br>Adriatic Sea [20]                                                                                 |
| 40.6–42.8                               | 3–3.3                                          |                              |                            |                      |                             |                                     |                                   | Western Adriatic Sea [21]                                                                                                      |
| 59–63                                   | 2.5–3                                          | 30                           | 40                         | 2 (rarely<br>3)      | 12                          |                                     |                                   | New Zealand [22]                                                                                                               |
| 26.3–63.7                               | 2.2–3.9                                        | 20–30                        |                            | 2–3                  | 11–12                       | 55–60                               | 2 × 2                             | Coastal waters of south-east-<br>ern, Australia [23]                                                                           |
| 52–63                                   | 2.5–3.3                                        | 25–28                        | 35–40                      | 1–2                  | 11–13                       |                                     |                                   | Southern cone of South<br>America [24]                                                                                         |
| 50–57.3                                 | 2.7–3.6                                        | 23–25                        | 37–40                      | 2                    | 9–10                        |                                     |                                   | Manzanillo and Santiago Bay<br>[25]                                                                                            |

**Table S3.** List of sequences of *Pseudo-nitzschia*, *Fragilariopsis* and *Nitzschia* strains included in the molecular analysis. Species, locality, strain code and GenBank accession numbers for the ITS2 gene marker.

| Species                                 | Locality                                                           | Strain Code  | GenBank Accession Number/Sequence Code |
|-----------------------------------------|--------------------------------------------------------------------|--------------|----------------------------------------|
| <i>Pseudo-nitzschia multistriata</i>    | Paracas bay, Peru                                                  | IMP-BG 440   | MZ312514                               |
| <i>Fragilariopsis cylindricus</i>       | Gulf of St. Lawrence, Anticosti gyre, 49°43' N, 66°15' W, Artic    | F_cyl        | EF660055                               |
| <i>Fragilariopsis nana</i>              | 49°S, 2°E, Antartic                                                | PA plate12A4 | EF660060                               |
| <i>Fragilariopsis nana</i>              | Ross Sea, 74°0'2''S 140°0'76''W, Ice, Antarctic                    | 2-E-F        | EF660058                               |
| <i>Fragilariopsis nana</i>              | Weddell Sea, ice, Antartica                                        | ErikaFcyl    | EF660059                               |
| <i>Fragilariopsis</i> sp.               | NL-2010 Twin Harbor, Washington, USA                               | Rita9        | GU170665                               |
| <i>P. heimii</i> / <i>P. subpacific</i> | Bilbao estuary (43°35' N, 3°05' W), Spain                          | Ner-1D       | KC409107                               |
| <i>Pseudo-nitzschia abrensis</i>        | Bay of Biscay, Atlantic Ocean                                      | NerJ3        | KC409109                               |
| <i>Pseudo-nitzschia abrensis</i>        | Bay of Biscay, Atlantic Ocean                                      | NerJ2        | KC409108                               |
| <i>Pseudo-nitzschia abrensis</i>        | Krokop, Miri, Sarawak, Malaysia                                    | Pnmi19       | KR021327                               |
| <i>Pseudo-nitzschia abrensis</i>        | Rait, Miri, Sarawak, Malaysia                                      | Pnmi168      | KR021324                               |
| <i>Pseudo-nitzschia americana</i>       |                                                                    | Pseud_amer   |                                        |
| <i>Pseudo-nitzschia americana</i>       | France                                                             | Kervel       | EU523099                               |
| <i>Pseudo-nitzschia arctica</i>         | Beaufort Sea, Canada                                               | RCC2002      | KT808253                               |
| <i>Pseudo-nitzschia arctica</i>         | Beaufort Sea, Canada                                               | RCC2005      | KT808255                               |
| <i>Pseudo-nitzschia arenysensis</i>     | Nervion River Estuary, Spain                                       | NerD1        | GQ228393                               |
| <i>Pseudo-nitzschia arenysensis</i>     | Gulf of Naples, Italy, Mediterranean Sea                           | AL-24        | DQ813830                               |
| <i>Pseudo-nitzschia arenysensis</i>     | Arenys, Spain                                                      | ICMB129      | EU367951                               |
| <i>Pseudo-nitzschia australis</i>       | station LY1 (Lynn of Lorne), western Scottish waters, Scotland, UK | PLYSt19A     | AY452527                               |
| <i>Pseudo-nitzschia australis</i>       | Monterey Bay, California, USA                                      | Au43         | DQ062661                               |
| <i>Pseudo-nitzschia australis</i>       | Santa Cruz Wharf, California, USA                                  | Pn15         | KC329501                               |
| <i>Pseudo-nitzschia batesiana</i>       | Teluk Batik, Perak, Malaysia                                       | PnTb19       | KC147514                               |
| <i>Pseudo-nitzschia batesiana</i>       | Marina Bay, Miri, Sarawak, Malaysia                                | Pnmi02       | KR021328                               |
| <i>Pseudo-nitzschia batesiana</i>       | Miri, Sarawak, Malaysia                                            | PnMi32       | KX572953                               |
| <i>Pseudo-nitzschia bipertita</i>       | Miri, Sarawak, Malaysia                                            | Pnmi13       | KR021320                               |
| <i>Pseudo-nitzschia bipertita</i>       | Miri, Sarawak, Malaysia                                            | Pnmi04       | KR021318                               |
| <i>Pseudo-nitzschia bipertita</i>       | Miri, Sarawak, Malaysia                                            | Pnmi18       | KR021319                               |
| <i>Pseudo-nitzschia brasiliiana</i>     | Samariang Batu, Sarawak, Malaysia                                  | PnSm07       | HQ111404                               |
| <i>Pseudo-nitzschia brasiliiana</i>     | Kota Kinabalu, Sabah, Malaysia                                     | PnKk31       | JN252429                               |
| <i>Pseudo-nitzschia bucculenta</i>      | Namibia                                                            | L2.6         | MH376339                               |
| <i>Pseudo-nitzschia bucculenta</i>      | Namibia                                                            | L1.3         | MH376341                               |
| <i>Pseudo-nitzschia bucculenta</i>      | Namibia                                                            | L1.1         | MH376340                               |

|                                                 |                                          |                |          |
|-------------------------------------------------|------------------------------------------|----------------|----------|
| <i>Pseudo-nitzschia caciantha</i>               | Do Son, North Vietnam                    | DS2            | AY257856 |
| <i>Pseudo-nitzschia caciantha</i>               | Near Tuxpam, Mexico                      | Mex20          | AY257861 |
| <i>Pseudo-nitzschia caciantha</i>               | Sibu Laut, Sarawak, Malaysia             | PnSL03         | KF482055 |
| <i>Pseudo-nitzschia caciantha</i>               | Sibu Laut, Sarawak, Malaysia             | PnSL05         | KF482056 |
| <i>Pseudo-nitzschia caciantha</i>               | Gulf of Naples, Italy, Mediterranean Sea | AL-56          | DQ813834 |
| <i>Pseudo-nitzschia calliantha</i>              | Gulf of Naples, Italy, Mediterranean Sea | AL-112         | DQ813841 |
| <i>Pseudo-nitzschia</i> cf. <i>sub-pacifica</i> | Limens, Spain                            | Limens8        | AY257859 |
| <i>Pseudo-nitzschia</i> cf. <i>sub-pacifica</i> | Costa Nova, Portugal                     | P-28           | AY257858 |
| <i>Pseudo-nitzschia circumpora</i>              | Santubong, Sarawak, Malaysia             | PnSb58         | JN252430 |
| <i>Pseudo-nitzschia cuspidata</i>               | Tenerife, Canary Islands, Spain          | Tenerife8      | AY257853 |
| <i>Pseudo-nitzschia cuspidata</i>               | Washington, USA                          | NWFSC189       | KX572955 |
| <i>Pseudo-nitzschia cuspidata</i>               | Washington, USA                          | NWFSC190       | JN091757 |
| <i>Pseudo-nitzschia cuspidate</i>               | St. John Island, Singapore               | PnSg10         | KX572957 |
| <i>Pseudo-nitzschia cuspidata</i>               | Near Tuxpam, Mexico                      | Mex12          | AY257852 |
| <i>Pseudo-nitzschia cuspidata</i>               | Bondi Beach, Sydney, Australia           | Sydney1        | AY257862 |
| <i>Pseudo-nitzschia cuspidata</i>               | Gulf of Naples, Italy, Mediterranean Sea | AL-17          | DQ813827 |
| <i>Pseudo-nitzschia decipiens</i>               | Kota Kinabalu, Sabah, Malaysia           | PnKk38         | KP337355 |
| <i>Pseudo-nitzschia decipiens</i>               | Tuxpam, Gulf of Mexico, Mexico           | Mex13          | DQ336156 |
| <i>Pseudo-nitzschia decipiens</i>               | Canary Islands, Spain                    | GranCan4-1     | DQ336157 |
| <i>Pseudo-nitzschia delicatissima</i>           | Hobart, Tasmania, Australia              | Tasm_10        | AY257848 |
| <i>Pseudo-nitzschia delicatissima</i>           | Ràpita, Catalunya, Spain                 | ICMB-102       | EU478793 |
| <i>Pseudo-nitzschia delicatissima</i>           | Gulf of Naples, Italy, Mediterranean Sea | AL-22          | DQ813829 |
| <i>Pseudo-nitzschia dolorosa</i>                | Monterey Bay, California, USA            | Calif1         | DQ336152 |
| <i>Pseudo-nitzschia dolorosa</i>                | Gulf of Naples, Italy, Mediterranean Sea | AL-59          | DQ813835 |
| <i>Pseudo-nitzschia fraudulenta</i>             | Limens, Spain                            | Limens1        | AY257840 |
| <i>Pseudo-nitzschia fraudulenta</i>             | Arenys, Cataluña, Spain                  | ICMB-105 (AR3) | DQ990366 |
| <i>Pseudo-nitzschia fraudulenta</i>             | French Coast                             | F10            | EU523102 |
| <i>Pseudo-nitzschia fryxelliana</i>             | Washington State, USA                    | NWFSC41        | JN050288 |
| <i>Pseudo-nitzschia fryxelliana</i>             | Washington State, USA                    | NWFSC42        | JN050287 |
| <i>Pseudo-nitzschia fukuyoi</i>                 | Marina Bay, Miri, Sarawak, Malaysia      | Pnmi158        | KR021317 |
| <i>Pseudo-nitzschia fukuyoi</i>                 | Kota Kinabalu, Sabah, Malaysia           | PnKk36         | KC147515 |
| <i>Pseudo-nitzschia fukuyoi</i>                 | Teluk Batik, Perak, Malaysia             | PnTb25         | KC147516 |
| <i>Pseudo-nitzschia galaxiae</i>                | Near Tuxpam, Mexico                      | Mex23          | AY257850 |
| <i>Pseudo-nitzschia galaxiae</i>                | Greece                                   | 10_4A3         | JF714915 |
| <i>Pseudo-nitzschia galaxiae</i>                | P. Olympic, Catalunya, Spain             | ICMB173        | EU327368 |
| <i>Pseudo-nitzschia galaxiae</i>                | Australia                                | Sydney4        | DQ336158 |
| <i>Pseudo-nitzschia granii</i>                  | Ocean Station Papa (50 N, 145 W)         | UBC100         | EU051654 |

|                                      |                                                                |                |          |
|--------------------------------------|----------------------------------------------------------------|----------------|----------|
| <i>Pseudo-nitzschia granii</i>       | Cruise MALINA, sampling station PAC060709A, North East Pacific | RCC2273        | KT948061 |
| <i>Pseudo-nitzschia hasleana</i>     | Washington State, USA                                          | NWFSC252       | JN085962 |
| <i>Pseudo-nitzschia hasleana</i>     | Hawkesbury River (-33°33'S, 151°18'E), Australia               | HAWK3/1        | KC017450 |
| <i>Pseudo-nitzschia heimii</i>       |                                                                | NWFSC205       | JN091762 |
| <i>Pseudo-nitzschia inflatula</i>    | Phuket, Thailand                                               | no7            | DQ329204 |
| <i>Pseudo-nitzschia kodamae</i>      | Port Dickson, Negeri Sembilan, Malaysia                        | PnPd26         | KF482050 |
| <i>Pseudo-nitzschia kodamae</i>      | Port Dickson, Negeri Sembilan, Malaysia                        | PnPd31         | KF482051 |
| <i>Pseudo-nitzschia limii</i>        | Rait, Miri, Sarawak, Malaysia                                  | Pnmi06         | KR021313 |
| <i>Pseudo-nitzschia limii</i>        | Rait, Miri, Sarawak, Malaysia                                  | Pnmi16         | KR021311 |
| <i>Pseudo-nitzschia lundholmiae</i>  | Teluk Batik, Perak, Malaysia                                   | PnTb10         | KC147523 |
| <i>Pseudo-nitzschia lundholmiae</i>  | Krokop, Miri, Sarawak, Malaysia                                | Pnmi28         | KR021316 |
| <i>Pseudo-nitzschia lundholmiae</i>  | Teluk Batik, Perak, Malacca Strait, Malaysia                   | PnTb01         | KC147522 |
| <i>Pseudo-nitzschia mannii</i>       | Pesaro, Adriatic Sea, Italy                                    | CBA56          | HE650977 |
| <i>Pseudo-nitzschia mannii</i>       | Gulf of Naples, Italy, Mediterranean Sea                       | AL-101         | DQ813839 |
| <i>Pseudo-nitzschia mannii</i>       | Thermaikos Gulf, Greece                                        | (08)10A2       | JF714905 |
| <i>Pseudo-nitzschia micropora</i>    | Van Phong Bay, Vietnam                                         | VPB_B3         | AY257847 |
| <i>Pseudo-nitzschia micropora</i>    | Kota Kinabalu, Sabah, Malaysia                                 | PnKk14         | JN252422 |
| <i>Pseudo-nitzschia multiseries</i>  | Monterey Bay, California, USA                                  | Mu3            | AY257844 |
| <i>Pseudo-nitzschia multiseries</i>  | Ofunato Bay, Japan                                             | OFPM984        | DQ062664 |
| <i>Pseudo-nitzschia multistriata</i> | Tarragona, Catalonia, Spain                                    | ICMB-113(CM1)  | DQ990367 |
| <i>Pseudo-nitzschia multistriata</i> | Port hacking, New South Wales, Australia                       | PH25C          | KC017470 |
| <i>Pseudo-nitzschia multistriata</i> | Tarragona, Catalonia, Spain                                    | ICMB-115 (CM3) | DQ990369 |
| <i>Pseudo-nitzschia multistriata</i> | Gulf of Naples, Italy                                          | A/B3           | EF636680 |
| <i>Pseudo-nitzschia multistriata</i> | Rait, Miri, Sarawak, Malaysia                                  | Pnmi07         | KR021314 |
| <i>Pseudo-nitzschia multistriata</i> | 43°12'00" N, 131°54'50" E; Northwestern Sea of Japan           | MBRU_PMS-11    | KT247441 |
| <i>Pseudo-nitzschia multistriata</i> | Chin Hae Bay, South Korea                                      | KoreaA         | AY257843 |
| <i>Pseudo-nitzschia multistriata</i> | Thermaikos Gulf, Greece                                        | (07)12A2       | JF714926 |
| <i>Pseudo-nitzschia multistriata</i> | Gulf of Naples, Italy                                          | B5             | EF636677 |
| <i>Pseudo-nitzschia multistriata</i> | Taiwan Strait (Station B1), China                              | MC4173         | MK411976 |
| <i>Pseudo-nitzschia multistriata</i> | Aveiro lagoon, Portugal                                        | Alfa 5         | EU684237 |
| <i>Pseudo-nitzschia cf. obtusa</i>   | Tromsø, Norway                                                 | T5             | DQ062667 |
| <i>Pseudo-nitzschia plurisecta</i>   | Bay of Biscay, Spain, Atlantic Ocean                           | Ner-G4         | KC409088 |
| <i>Pseudo-nitzschia plurisecta</i>   | Bay of Biscay, Spain, Atlantic Ocean                           | Ner-J6         | KC409091 |
| <i>Pseudo-nitzschia plurisecta</i>   | Bay of Biscay, Spain, Atlantic Ocean                           | Ner-F1         | KC409089 |

|                                             |                                                            |             |          |
|---------------------------------------------|------------------------------------------------------------|-------------|----------|
| <i>Pseudo-nitzschia plurisecta</i>          | Gulf of Maine                                              | En345-153B5 | KF006829 |
| <i>Pseudo-nitzschia plurisecta</i>          | Tasmania, Australia                                        | Hobart5     | AY257851 |
| <i>Pseudo-nitzschia pseudodelicatissima</i> | Thermaikos Gulf, Greece                                    | 9A1         | FJ859050 |
| <i>Pseudo-nitzschia pseudodelicatissima</i> | Gulf of Naples, Italy, Mediterranean Sea                   | AL-15       | DQ813826 |
| <i>Pseudo-nitzschia pseudodelicatissima</i> | Nervion River Estuary, Bay of Biscay, Northern Spain       | Ner_D5      | GQ228392 |
| <i>Pseudo-nitzschia pungens</i>             | Santubong, Sarawak, Malaysia                               | PnSb44      | HQ111413 |
| <i>Pseudo-nitzschia pungens</i>             | MuaraTebas, Sarawak, Malaysia                              | PnMt45      | HQ111412 |
| <i>Pseudo-nitzschia sabit</i>               | Manzanillo Bay, Colima Mexico                              | Ps147       | KP288507 |
| <i>Pseudo-nitzschia sabit</i>               | Port Dickson, Negeri Sembilan, Malaysia                    | PnPd57      | KM400610 |
| <i>Pseudo-nitzschia sabit</i>               | Port Dickson, Negeri Sembilan, Malaysia                    | PnPd68      | KM400604 |
| <i>Pseudo-nitzschia sabit</i>               | Manzanillo Bay, Colima Mexico station LY1 (Lynn of Lorne), | Ps102       | KP288506 |
| <i>Pseudo-nitzschia seriata</i>             | western Scottish waters, Scotland, UK                      | PLYSt52B    | AY452524 |
| <i>Pseudo-nitzschia seriata</i>             | Nisum Bredning, Denmark                                    | Nisum3      | AY257841 |
| <i>Pseudo-nitzschia simulans</i>            | Taiwan Strait, East China Sea                              | MC984       | MF374772 |
| <i>Pseudo-nitzschia simulans</i>            | Qingdao, Yellow Sea                                        | MC282       | MF374770 |
| <i>Pseudo-nitzschia simulans</i>            | Daya Bay, South China Sea                                  | MC281       | MF374769 |
| <i>Pseudo-nitzschia simulans</i>            | Wanshan Island, South China Sea                            | MC940       | MF374771 |
| <i>Pseudo-nitzschia subcurvata</i>          | Ross Sea, Antarctic                                        | 1-F         | DQ329205 |
| <i>Pseudo-nitzschia subfraudulenta</i>      | Krokop, Miri, Sarawak, Malaysia                            | Pnmi71      | KR021299 |
| <i>Pseudo-nitzschia subfraudulenta</i>      | Marina Bay, Miri, Sarawak, Malaysia                        | Pnmi170     | KR021298 |
| <i>Pseudo-nitzschia subfraudulenta</i>      | Thermaikos Gulf, Greece                                    | (08)8A3     | JF714929 |
| <i>Pseudo-nitzschia subpacific</i>          | South Korea                                                | HY32E1      | LC194952 |
| <i>Pseudo-nitzschia turgidula</i>           | North East Pacific Ocean                                   | NWFSC220    | JN091764 |
| <i>Pseudo-nitzschia turgiduloides</i>       | Ross Sea, Antarctic                                        | 3-19        | AY257839 |
| <i>Nitzschia longissima</i>                 | Shilaoren Bay, China                                       | 33          | KJ671772 |

Bolded sequence indicates the sequence contributed from this study.

## References

1. Takano, H. Marine diatom *Nitzschia multistriata* sp. nov. common at inlets of southern Japan. *Diatom* **1993**, *8*, 39–41.
2. Stonik, I.V.; Orlova, T.Y.; Lundholm, N. Diversity of *Pseudo-nitzschia* H. Peragallo from the western North Pacific. *Diatom Research* **2011**, *26*, 121–134, doi:10.1080/0269249x.2011.573706.
3. Stonik, I.; Isaeva, M.; Aizdaicher, N.; Balakirev, E.; Ayala, F. Morphological and genetic identification of *Pseudo-nitzschia* H. Peragallo, 1900 (Bacillariophyta) from the Sea of Japan. *Russ. J. Mar. Biol.* **2018**, *44*, 192–201, doi:10.1134/S1063074018030100.
4. Yap-Dejeto, L.O.; Takuo & Nagahama, Y. & Fukuyo, Yasuwo. Observations of eleven *Pseudo nitzschia* species in Tokyo Bay, Japan. *Merine* **2010**, *48*, 1–16.

5. Orlova, T.Y.; Stonik, I.V.; Aizdaicher, N.A.; Bates, S.S.; Leger, C.; Fehling, J. Toxicity, morphology and distribution of *Pseudo-nitzschia calliantha*, *P. multistriata* and *P. multiseriata* (Bacillariophyta) from the north-western Sea of Japan. *Bot. Mar.* **2008**, *51*, 297–306, doi:10.1515/BOT.2008.035.
6. Lü, S.; Li, Y.; Lundholm, N.; Ma, Y.; Ho, K. Diversity, taxonomy and biogeographical distribution of the genus *Pseudo-nitzschia* (Bacillariophyceae) in Guangdong coastal waters, South China Sea. *Nova Hedwig.* **2012**, *95*, 123–152, doi:10.1127/0029-5035/2012/0046.
7. Larsen, J.; Lam, N.N. Potentially toxic microalgae of Vietnamese waters. *Opera Bot.* **2004**, 5–216.
8. Teng, S.T.; Leaw, C.P.; Lim, H.C.; Lim, P.T. The genus *Pseudo-nitzschia* (Bacillariophyceae) in Malaysia, including new records and a key to species inferred from morphology-based phylogeny. *Bot. Mar.* **2013**, *56*, 375–398, doi:10.1515/bot-2012-0194.
9. Tan, T.H.; Leaw, C.P.; Leong, S.C.Y.; Lim, L.P.; Chew, S.M.; Teng, S.T.; Lim, P.T. Marine micro-phytoplankton of Singapore, with a review of harmful microalgae in the region. *Raffles Bull. Zool.* **2016**.
10. Sahraoui, I.; Grami, B.; Bates, S.S.; Bouchouicha, D.; Chikhaoui, M.A.; Mabrouk, H.H.; Hlaili, A.S. Response of potentially toxic *Pseudo-nitzschia* (Bacillariophyceae) populations and domoic acid to environmental conditions in a eutrophied, SW Mediterranean coastal lagoon (Tunisia). *Estuar. Coast. Shelf Sci.* **2012**, *102*, 95–104, doi:10.1016/j.ecss.2012.03.018.
11. Hlaili, A.S.; Khalifa, I.S.; Bouchouicha-Smida, D.; Garali, S.M.; Ksouri, J.; Chalghaf, M.; Bates, S.S.; Lundholm, N.; Kooistra, W.H.; de la Iglesia, P. Toxic and potentially toxic diatom blooms in Tunisian (SW Mediterranean) waters: Review of ten years of investigations. *Adv. Environ. Res.* **2016**, *48*, 51–69.
12. Quijano-Sheggia, S.; Garcés, E.; Sampedro, N.; Van Lenning, K.; Flo Arcas, E.; Andree, K.; Fortuño Alós, J.M.; Camp, J. Identification and characterisation of the dominant *Pseudo-nitzschia* species (Bacillariophyceae) along the NE Spanish coast (Catalonia, NW Mediterranean). *Sci. Mar.* **2008**, *72*, 343–359.
13. Quijano-Sheggia, S.; Garcés, E.; Andree, K.B.; De la Iglesia, P.; Diogène, J.; Fortuño, J.M.; Camp, J. *Pseudo-nitzschia* species on the Catalan coast: Characterization and contribution to the current knowledge of the distribution of this genus in the Mediterranean Sea. *Sci. Mar.* **2010**, *74*, 395–410, doi:10.3989/sci-mar.2010.74n2395.
14. Churro, C.I.; Carreira, C.C.; Rodrigues, F.J.; Craveiro, S.C.; Calado, A.J.; Casteleyn, G.; Lundholm, N. Diversity and abundance of potentially toxic *Pseudo-nitzschia* Peragallo in Aveiro coastal lagoon, Portugal and description of a new variety, *P. pungens* var. *aveirensis* var. nov. *Diatom Res.* **2009**, *24*, 35–62, doi:10.1080/0269249X.2009.9705782.
15. Moschandreu, K.K.; Baxevanis, A.D.; Katikou, P.; Papaefthimiou, D.; Nikolaidis, G.; Abatzopoulos, T.J. Inter- and intra-specific diversity of *Pseudo-nitzschia* (Bacillariophyceae) in the northeastern Mediterranean. *Eur. J. Phycol.* **2012**, *47*, 321–339, doi:10.1080/09670262.2012.713998.
16. Rijat Leblad, B.; Lundholm, N.; Goux, D.; Veron, B.; Sagou, R.; Taleb, H.; Nhahla, H.; Er-Raioui, H. *Pseudo-nitzschia* Peragallo (Bacillariophyceae) diversity and domoic acid accumulation in tuberculate cockles and sweet clams in M'diq Bay, Morocco. *Acta Bot. Croat.* **2013**, *72*, 35–47, doi:10.2478/v10184-012-0004-x.
17. Orsini, L.; Sarno, D.; Procaccini, G.; Poletti, R.; Dahlmann, J.; Montresor, M. Toxic *Pseudo-nitzschia* multistriata (Bacillariophyceae) from the Gulf of Naples: Morphology, toxin analysis and phylogenetic relationships with other *Pseudo-nitzschia* species. *Eur. J. Phycol.* **2002**, *37*, 247–257, doi:10.1017/s0967026202003608.
18. Sarno, D. Production of domoic acid in another species of *Pseudo-nitzschia*: *P. multistriata* in the Gulf of Naples (Mediterranean Sea). *Harmful Algal News* **2000**, *21*, 5.
19. D'Alelio, D.; Amato, A.; Kooistra, W.H.; Procaccini, G.; Casotti, R.; Montresor, M. Internal transcribed spacer polymorphism in *Pseudo-nitzschia* multistriata (Bacillariophyceae) in the Gulf of Naples: Recent divergence or intraspecific hybridization? *Protist* **2009**, *160*, 9–20, doi:10.1016/j.protis.2008.07.001.
20. Dermastia, T.T.; Cerino, F.; Stanković, D.; Francé, J.; Ramšak, A.; Tušek, M.Ž.; Beran, A.; Natali, V.; Cabrini, M.; Mozetič, P. Ecological time series and integrative taxonomy unveil seasonality and diversity of the toxic diatom *Pseudo-nitzschia* H. Peragallo in the northern Adriatic Sea. *Harmful Algae* **2020**, *93*, 101773, doi:10.1016/j.hal.2020.101773.
21. Pistocchi, R.; Guerrini, F.; Pezzolesi, L.; Riccardi, M.; Vanucci, S.; Ciminiello, P.; Dell'Aversano, C.; Forino, M.; Fattorusso, E.; Tartaglione, L. Toxin levels and profiles in microalgae from the North-Western Adriatic Sea—15 years of studies on cultured species. *Mar. Drugs* **2012**, *10*, 140–162, doi:10.3390/md10010140.
22. Rhodes, L.L.; Adamson, J.; Scholin, C. *Pseudo-nitzschia* multistriata (Bacillariophyceae) in New Zealand. *N. Z. J. Mar. Freshw. Res.* **2000**, *34*, 463–467, doi:10.1080/00288330.2000.9516948.

23. Ajani, P.; Murray, S.; Hallegraeff, G.; Lundholm, N.; Gillings, M.; Brett, S.; Armand, L. The diatom genus *Pseudo-nitzschia* (Bacillariophyceae) in New South Wales, Australia: Morphotaxonomy, molecular phylogeny, toxicity, and distribution. *J. Phycol.* **2013**, *49*, 765–785, doi:10.1111/jpy.12087.
24. Méndez, S.M.; Ferrario, M.; Cefarelli, A.O. Description of toxigenic species of the genus *Pseudo-nitzschia* in coastal waters of Uruguay: Morphology and distribution. *Harmful Algae* **2012**, *19*, 53–60, doi:10.1016/j.hal.2012.05.007.
25. Rivera-Vilarelle, M.; Quijano-Scheggia, S.; Olivos-Ortiz, A.; Gaviño-Rodríguez, J.H.; Castro-Ochoa, F.; Reyes-Herrera, A. The genus *Pseudo-nitzschia* (Bacillariophyceae) in Manzanillo and Santiago Bays, Colima, Mexico. *Bot. Mar.* **2013**, *56*, 357–373.
